# Supplementary material for: Impact of the COVID-19 pandemic on mental health and well-being of communities: an exploratory qualitative study protocol
Source: PubMed Central journal article supplement — BMJ Open. 2020 Dec 31;10(12):e041641. doi: 10.1136/bmjopen-2020-041641 (PMC7780420; doi:10.1136/bmjopen-2020-041641), 2020-12-31
Supplement: bmjopen-2020-041641.draft_revisions.pdf [file bmjopen-2020-041641.draft_revisions.pdf]

# BMJ Open

BMJ Open is committed to open peer review. As part of this commitment we make the peer review history of every article we publish publicly available.

When an article is published we post the peer reviewers' comments and the authors' responses online. We also post the versions of the paper that were used during peer review. These are the versions that the peer review comments apply to.

The versions of the paper that follow are the versions that were submitted during the peer review process. They are not the versions of record or the final published versions. They should not be cited or distributed as the published version of this manuscript.

BMJ Open is an open access journal and the full, final, typeset and author-corrected version of record of the manuscript is available on our site with no access controls, subscription charges or pay-per-view fees (<http://bmjopen.bmj.com>).

If you have any questions on BMJ Open's open peer review process please email [info.bmjopen@bmj.com](mailto:info.bmjopen@bmj.com)

# BMJ Open

## When COVID-19 enters in community setting: An exploratory qualitative study of community perspectives on COVID-19 affecting mental well-being

|                               |                                                                                                                                                                                                                                                                                                                                                                                                              |
|-------------------------------|--------------------------------------------------------------------------------------------------------------------------------------------------------------------------------------------------------------------------------------------------------------------------------------------------------------------------------------------------------------------------------------------------------------|
| Journal:                      | <i>BMJ Open</i>                                                                                                                                                                                                                                                                                                                                                                                              |
| Manuscript ID                 | bmjopen-2020-041641                                                                                                                                                                                                                                                                                                                                                                                          |
| Article Type:                 | Protocol                                                                                                                                                                                                                                                                                                                                                                                                     |
| Date Submitted by the Author: | 16-Jun-2020                                                                                                                                                                                                                                                                                                                                                                                                  |
| Complete List of Authors:     | Shahil Feroz, Anam; Aga Khan University, Community Health Sciences Akberali, Naureen; Aga Khan University, School of Nursing and Midwifery Akber Ali, Noshaba; Aga Khan University Feroz, Rida; Aga Khan University Institute for Educational Development Pakistan<br>Nazim Meghani, Salima; Aga Khan University, Community Health Sciences<br>Saleem, Sarah; Aga Khan University, Community Health Sciences |
| Keywords:                     | MENTAL HEALTH, Public health < INFECTIOUS DISEASES, PUBLIC HEALTH                                                                                                                                                                                                                                                                                                                                            |
|                               |                                                                                                                                                                                                                                                                                                                                                                                                              |

SCHOLARONE™  
Manuscripts

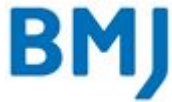

I, the Submitting Author has the right to grant and does grant on behalf of all authors of the Work (as defined in the below author licence), an exclusive licence and/or a non-exclusive licence for contributions from authors who are: i) UK Crown employees; ii) where BMJ has agreed a CC-BY licence shall apply, and/or iii) in accordance with the terms applicable for US Federal Government officers or employees acting as part of their official duties; on a worldwide, perpetual, irrevocable, royalty-free basis to BMJ Publishing Group Ltd ("BMJ") its licensees and where the relevant Journal is co-owned by BMJ to the co-owners of the Journal, to publish the Work in this journal and any other BMJ products and to exploit all rights, as set out in our [licence](#).

The Submitting Author accepts and understands that any supply made under these terms is made by BMJ to the Submitting Author unless you are acting as an employee on behalf of your employer or a postgraduate student of an affiliated institution which is paying any applicable article publishing charge ("APC") for Open Access articles. Where the Submitting Author wishes to make the Work available on an Open Access basis (and intends to pay the relevant APC), the terms of reuse of such Open Access shall be governed by a Creative Commons licence – details of these licences and which [Creative Commons](#) licence will apply to this Work are set out in our licence referred to above.

Other than as permitted in any relevant BMJ Author's Self Archiving Policies, I confirm this Work has not been accepted for publication elsewhere, is not being considered for publication elsewhere and does not duplicate material already published. I confirm all authors consent to publication of this Work and authorise the granting of this licence.

1  
2  
3 **1 Paper Title:**  
4

5 2 When COVID-19 enters in community setting: An exploratory qualitative study of community  
6 3 perspectives on COVID-19 affecting mental well-being  
7  
8

9  
10 **4 Author Names:**  
11

- 12 5 1. Ms. Anam Shahil Feroz<sup>1\*</sup> (ASF)  
13  
14 6 2. Ms. Naureen Akber Ali<sup>2</sup> (NAA)  
15  
16 7 3. Ms. Noushaba Akber Ali<sup>3</sup> (NBA)  
17  
18 8 4. Ms. Rida Feroz<sup>4</sup> (RF)  
19  
20 9 5. Ms. Salima Nazim Meghani<sup>5</sup> (SNM)  
21  
22 10 6. Dr Sarah Saleem<sup>6</sup> (SS)  
23  
24  
25

26 **11 Full institutional mailing addresses of all authors**  
27

28 12 <sup>1, 3,5,6</sup> The Aga Khan University – Department of Community Health Sciences, Stadium Road, PO  
29 13 Box 3500, Karachi 74800, Pakistan

30  
31  
32 14 <sup>2</sup>The Aga Khan University – School of Nursing and Midwifery, Stadium Road, PO Box 3500,  
33 15 Karachi 74800, Pakistan  
34  
35

36  
37 16 <sup>4</sup>Aga Khan University Institute for Educational Development, Karachi, Pakistan  
38  
39

40 **17 Email addresses:**  
41

- 42 18 1. Ms. Anam Shahil Feroz<sup>\*1</sup> – AF- [anam.feroz@aku.edu](mailto:anam.feroz@aku.edu)  
43  
44 19 2. Ms. Naureen Akber Ali<sup>2</sup> – NAA - [naureen.akberali@aku.edu](mailto:naureen.akberali@aku.edu)  
45  
46 20 3. Ms. Noshaba Akber Ali<sup>3</sup> (NBA) – [noshaba.akber07@gmail.com](mailto:noshaba.akber07@gmail.com)  
47  
48 21 4. Ms. Rida Feroz<sup>4</sup> (RF) - [ridah.feroz.mphil19@student.aku.edu](mailto:ridah.feroz.mphil19@student.aku.edu)  
49  
50 22 5. Ms. Salima Nazim Meghani<sup>5</sup> (SNM) - [salima.ratnani@gmail.com](mailto:salima.ratnani@gmail.com)  
51  
52 23 6. Dr Sarah Saleem<sup>6</sup> – SS – [sarah.saleem@aku.edu](mailto:sarah.saleem@aku.edu)  
53  
54  
55

56 **24 Corresponding Author\*:**  
57  
58  
59  
60

1  
2  
3  
4  
5  
6  
7  
8  
9  
10  
11  
12  
13  
14  
15  
16  
17  
18  
19  
20  
21  
22  
23  
24  
25  
26  
27  
28  
29  
30  
31  
32  
33  
34  
35  
36  
37  
38  
39  
40  
41  
42  
43  
44  
45  
46  
47  
48  
49  
50  
51  
52  
53  
54  
55  
56  
57  
58  
59  
60

1. Ms. Anam Shahil Feroz\*<sup>1</sup> – AF- [anam.feroz@aku.edu](mailto:anam.feroz@aku.edu)

Postal Address: 1. Aga Khan University, Community Health Sciences Karachi, PK

Phone Number: 922134864917

**Key words:** COVID-19, exploratory qualitative study, mental health, community, perceptions

**Word count:** 1944 words

For peer review only

## 31 **Abstract**

32 Introduction: The COVID-19 pandemic has certainly resulted in an increased level of anxiety and  
33 fear among general population related to its management and infection spread. Due to fear and social  
34 stigma linked with COVID-19, many individuals in the community hide their disease and didn't  
35 reach health care facilities in timely manner. In addition, rumors, myths and inaccurate information  
36 about virus are also spreading rapidly with the wide spread use of social media leading to intensified  
37 irritability, fearfulness, insomnia, oppositional behavior and somatic complaints. Considering the  
38 relevance of all the above factors, we aim to explore perceptions and attitudes of community  
39 members towards COVID-19 and its impact on their daily lives and mental well-being.

40 Methods and analysis: This formative research will employ an exploratory qualitative research  
41 design using semi-structured interviews and a purposive sampling approach. The data collection  
42 methods for this formative research will include in-depth interviews (IDIs) with community  
43 members. The study will be conducted in Karimabad FB area and Garden (East and West)  
44 community settings of Karachi, Pakistan. The areas have been selected purposively to interview  
45 members of these communities. Study data will be analyzed thematically using NVivo 12 Plus  
46 software.

47 Ethics and Dissemination: Ethical approval for this study has been obtained from the Aga Khan  
48 University Ethical Review Committee (AKU-ERC) [2020-4825-10599]. The study results will be  
49 disseminated to scientific community and research subjects participating in this study. The findings  
50 of this study will help us explore perceptions and attitudes of different community members towards  
51 COVID-19 pandemic, and its impact on daily lives and mental well-being of individuals in the  
52 community.

53

54

1  
2  
3 55 Strengths and limitations of this study  
4  
5

- 6 56 • The mental health impact of the pandemic is likely to last much longer than the physical  
7 health impact and therefore this study is positioned well to explore perceptions and attitudes  
8 57 of community members towards COVID-19 pandemic, and its impact on their daily lives  
9 58 and mental well-being.  
10 59  
11 60 • This study will guide the development of context-specific innovative mental health programs  
12 to support communities in future.  
13 61  
14 62 • One limitation is that all study respondents were interviewed online, to minimize the risk of  
15 infection. Due to this reason, the authors will not have the opportunity to build rapport with  
16 respondents over Zoom or obtain non-verbal cues during interviews  
17 63  
18 64  
19  
20  
21  
22  
23  
24 66  
25  
26  
27  
28  
29  
30  
31  
32  
33  
34  
35  
36  
37  
38  
39  
40  
41  
42  
43  
44  
45  
46  
47  
48  
49  
50  
51  
52  
53  
54  
55  
56  
57  
58  
59  
60

## 67 **Background**

68 COVID-19 pandemic has affected almost 180 countries, since its first detection in Wuhan, China,  
69 in December 2019 (1, 2). The COVID-19 outbreak has been declared as a Public Health Emergency  
70 of International Concern by the World Health Organization (WHO) (3). WHO estimates the global  
71 mortality of about 3.4%(4), however, the death rates will vary between countries and across age  
72 groups.(5). In Pakistan, a total of 10,880 cases and 228 deaths has been reported, to date, due to  
73 COVID-19 infection (6).

74 The worldwide COVID-19 pandemic has not only incurred massive challenges to the global supply  
75 chains and healthcare systems but also has detrimental effect on the overall health of individuals (7).  
76 The pandemic has led to lockdowns and has created havoc impact on the societies at large. Most  
77 company employees' including daily wages workers have been prohibited from accessing their  
78 workplaces or being asked to work from home which has caused job related insecurities and financial  
79 crisis among the communities (8). Besides, educational institution and training centers have been  
80 closed due to which children have lost their routine of going schools, studying and socializing with  
81 their peers. Also, the delay in examinations is likewise a huge stressor for students (8). Alongside,  
82 parents have been struggling on creating a structure milieu for their children(9). COVID-19 has  
83 hindered the normal routine life of every individual be it children, teenager, adult or elderly. The  
84 crisis is engendering burden throughout the population particularly in developing countries like  
85 Pakistan that face the major challenges due to the fragile health care systems and poor economic  
86 structures (10)

87 The pandemic of COVID-19 has certainly resulted in an increased level of anxiety and fear among  
88 general population related to its management and infection spread(8). Further, highly contagious  
89 nature of the COVID-19 has also escalated confusion, fear and panic among the general population.  
90 Moreover, social distancing is often an unpleasant experience for the community members and for  
91 the patients who undergoes it as it adds to mental suffering, particularly in the local setting where  
92 get-togethers with friends and families is a major source of entertainment(9). Recent studies also  
93 showed that individuals who are following social distancing experience loneliness causing  
94 substantial level of distress in the form of anxiety, stress, anger, misperception and post-traumatic  
95 stress symptoms (8, 11). Separation from the family members, the loss of autonomy, insecurity over



1  
2  
3 96 disease status, inadequate supplies, inadequate information, financial loss, frustration, stigma and  
4  
5 97 boredom, are all major stressors that can create drastic impacts on individual's life. (11). Due to fear  
6  
7 98 and social stigma linked with COVID-19, many individuals in the community hide their disease and  
8  
9 99 didn't reach health care facilities timely (12). In addition rumors, myths and inaccurate information  
10  
11 100 about covid 19 are also spreading rapidly with the wide spread use of social media (13) that is not  
12  
13 101 only confined to adults but is also carried onto the children leading to intensified irritability,  
14  
15 102 fearfulness, insomnia, oppositional behavior and somatic complaints(9). The psychological  
16  
17 103 symptoms associated with COVID-19 at community level is also manifested as anxiety driven panic  
18  
19 104 buying, resulting in exhaustion of resources from the market (14). Some level of panic also dwells  
20  
21 105 in the community because of the unavailability of essential protective equipment particularly masks  
22  
23 106 and sanitizers (15). Similarly, mental health issues including depression, anxiety, panic attacks,  
24  
25 107 psychotic symptoms and even suicide were also reported during the early SARS outbreak (16, 17).  
26  
27 108 Likely, the COVID-19 is also posing a similar risk throughout the world (12).

28  
29 109 The fear of transmitting disease or family member falling ill is a probable mental function of the  
30  
31 110 human nature, but at some point psychological fear of the disease generates more anxiety than the  
32  
33 111 disease itself. Therefore, mental health problems are likely to increase in an epidemic situation  
34  
35 112 among community members. Considering the relevance of all the above factors, we aim to explore  
36  
37 113 perceptions and attitudes of community members towards COVID-19 pandemic, and its impact on  
38  
39 114 their daily lives and mental well-being.

## 115 **Methods and analysis**

### 116 ***Study design***

117 This study will employ an exploratory qualitative research design using semi-structured interviews  
118 and a purposive sampling approach. The data collection methods for this formative research will  
119 include in-depth *interviews* (IDIs) with community members. The aim of the IDIs is to explore  
120 perceptions of community members towards COVID-19 and its impact on their mental well-being.

### 121 ***Study setting and study participants***

122 The study will be conducted in two communities of Karachi city. These include, Karimabad

1  
2  
3 123 Federal B Area Block 3 Gulberg Town, Garden East and Garden West area of Karachi city.  
4  
5 124 Karimabad is a neighborhood in the Karachi Central district of Karachi, Pakistan. It is situated at  
6  
7 125 south of Gulberg Town bordering Liaquatabad, Gharibabad and Federal B. Area. The population of  
8  
9 126 this neighborhood is predominantly Ismailis. People living here belong mostly to middle class to  
10  
11 127 lower middle class. It is also known for its whole-sale market of sports goods and stationery.  
12  
128 Garden is an upmarket neighborhood, which is in the Karachi South district of Karachi, Pakistan. It  
13  
14 129 is subdivided into two neighborhoods: Garden East and Garden West. It is the residential area  
15  
16 130 around the Karachi Zoological Gardens, hence it is popularly known as 'Garden' area. The  
17  
18 131 population of Garden used to be primarily Ismaili and Goan Catholic, but has seen increasing  
19  
20 132 numbers of Memons, Pashtuns, and Baloch. These areas have been selected purposively to interview  
21  
22 133 members of these communities. Adult community members of different ages and both genders will  
23  
24 134 be interviewed from both sites, as mentioned in the below table 1.

25 135 Table 1 Study participants for IDIs

| In-depth interview Participants  | Sample Range            |
|----------------------------------|-------------------------|
| Young adults (18 -35 years)      | 6-8 (4 male & 4 female) |
| Middle-aged adults (36-55 years) | 6-8 (4 male & 4 female) |
| Older adults (> 55 years)        | 6-8 (4 male & 4 female) |

31  
32 136 ***In-depth interviews with community members***

33  
34 137 We will conduct in-depth interviews (IDIs) with community members to explore perceptions and  
35  
36 138 attitudes of community members towards COVID-19 and its effects on their daily lives and mental  
37  
38 139 well-being. The in-depth interview participants will be identified via community WhatsApp group.  
39  
40 140 The in-depth interview participant will be invited for interview via WhatsApp message or email.  
41  
42 141 The consent will be taken over email or WhatsApp before the interview begins, in which they will  
43  
44 142 agree that the interview can be audio-recorded and written notes can be taken. The interviews will  
45  
46 143 be conducted in either Urdu or English language and each interview will last around 40 to 50 minutes  
47  
48 144 in duration. Study participants will be assured that their information will remain confidential and no  
49  
50 145 identifying features will be mentioned on the transcript. The major themes will include a general  
51  
52 146 discussion about participant's knowledge and perceptions about COVID-19 pandemic, perceptions  
53  
54 147 on safety measures, and perceived challenges in current situation and its impact on their mental well-  
55  
56 148 being. We anticipate that 24-30 interviews will be conducted but we will cease interviews once data  
57  
58 149 saturation will be achieved.

1  
2  
3 150 Interview guide for IDIs are given in Annex 1.  
4

5  
6 151 ***Eligibility criteria***  
7

8 152 The inclusion and exclusion criteria for study participants are provided below:  
9

10 153 **Inclusion criteria**  
11

- 12  
13 154 • Residents of garden (East and west) and karimabad FB area community of Karachi, who  
14 have not contracted the disease.  
15

16 156 **Exclusion criteria**  
17

- 18  
19 157 • Those who refuse to participate in this study  
20  
21 158 • Participants who have experienced COVID-19 and are undergoing treatment  
22  
23 159 • Participants who are suspected for COVID-19 and have been isolated/quarantined  
24  
25 160 • Family members of covid positive cases  
26  
27

28 162 ***Ethical considerations***  
29

30 163 Study participants will be asked to provide informed, written consent prior to participation in this  
31 study. The informed consent form can be submitted by the participant via WhatsApp or email.  
32 164 Participants who are unable to write their names will be asked to provide a thumbprint to symbolize  
33 their consent to participate. Ethical approval for this study has been obtained from the Aga Khan  
34 165 University Ethical Review Committee (AKU-ERC) [2020-4825-10599].  
35  
36  
37  
38

39  
40 168 ***Data Collection Procedure***  
41

42 169 Semi-structured interview guide has been developed for community members. The guide will help  
43 to explore participants' views towards COVID-19 and understand their perceptions on the mental  
44 170 wellbeing in light of the current situation. All semi-structured interviews will be conducted online  
45 via zoom technology or WhatsApp. Interviews will be scheduled on participant convenient day and  
46 171 time. Interviews are anticipated to begin in May 10, 2020.  
47  
48  
49  
50

51 174 ***Patient and Public Involvement:***  
52

53  
54 175 No patient involved  
55  
56  
57  
58  
59  
60

1  
2  
3 176 ***Data analysis***  
4

5  
6 177 We will transcribe and translate collected data into English Language by listening to the audio  
7  
8 178 recordings to perform a thematic analysis. NVivo 12 Plus software will be used to import, organize  
9  
10 179 and explore data for analysis purpose. We will read the transcripts various times to develop  
11  
12 180 familiarity and clarification with the data. We will use iterative process that will help us to label the  
13  
14 181 data and generate new categories to identify the emergent themes. The recorded text will be divided  
15  
16 182 into shortened units and labeled as a ‘code’ without losing the main essence of the research study.  
17  
18 183 Subsequently, codes will be then analyzed and merged into comparable categories. Lastly, same  
19  
20 184 categories will be grouped under sub-themes and final themes. Two independent investigators will  
21  
22 185 perform the coding, category creation, and thematic analyses, and discrepancies will be resolved to  
23  
24 186 reduce researcher’s bias

25  
26 187 **Discussion**

27  
28 188 The findings of this study will help us to explore perceptions and attitudes towards COVID-19  
29  
30 189 pandemic, and its impact on daily lives and mental well-being of individuals in the community.  
31  
32 190 Besides, an in-depth understanding of the needs of the community will be identified, that will help  
33  
34 191 us develop context-specific innovative mental health programs to support communities in future.  
35  
36 192 The study will provide insights on how communities are managing their lives under such difficult  
37  
38 193 situation.

39  
40  
41  
42  
43  
44  
45  
46  
47  
48  
49  
50  
51  
52  
53  
54  
55  
56  
57  
58  
59  
60

1  
2  
3  
4  
5  
6  
7  
8  
9  
10  
11  
12  
13  
14  
15  
16  
17  
18  
19  
20  
21  
22  
23  
24  
25  
26  
27  
28  
29  
30  
31  
32  
33  
34  
35  
36  
37  
38  
39  
40  
41  
42  
43  
44  
45  
46  
47  
48  
49  
50  
51  
52  
53  
54  
55  
56  
57  
58  
59  
60

195 a. Contributorship statement

196 The qualitative study was conceptualized by NAA & AF. NAA prepared the first draft of the manuscript. AF  
197 reviewed the manuscript several times and provided feedback. All authors have contributed to this  
198 manuscript, and reviewed and approved the final version of the paper.

199  
200 b. Competing interests

201 The authors declare that they have no competing interests.

202  
203 c. Funding

204 Self-funded

205  
206 d. Data sharing statement

207 Materials described in this paper pertain to the study protocol only and there are no raw data reported.  
208 The datasets will be collected and analyzed and can be made available from the corresponding author on  
209 reasonable request.

210

211 **References:**

- 212 1. Heymann DL. Data sharing and outbreaks: best practice exemplified. *The Lancet*.  
213 2020;395(10223):469-70.
- 214 2. Vara. V. Coronavirus outbreak: The countries affected. 16 April 2020. Accessed from:  
215 <https://www.pharmaceutical-technology.com/features/coronavirus-outbreak-the-countries-affected/>.
- 216 3. World Health Organization. Mental health and psychosocial considerations during the COVID-19  
217 outbreak, 18 March 2020. World Health Organization; 2020.
- 218 4. WHO, 2020b. Coronavirus Disease 2019 (COVID-19) Situation Report – 46. Accessed from:  
219 [https://www.who.int/docs/default-source/coronaviruse/situation-reports/20200306-sitrep-46-COVID-](https://www.who.int/docs/default-source/coronaviruse/situation-reports/20200306-sitrep-46-COVID-19.pdf?sfvrsn=96b04adf_2)  
220 [19.pdf?sfvrsn=96b04adf\\_2](https://www.who.int/docs/default-source/coronaviruse/situation-reports/20200306-sitrep-46-COVID-19.pdf?sfvrsn=96b04adf_2)
- 221 5. Baud D, Qi X, Nielsen-Saines K, Musso D, Pomar L, Favre G. Real estimates of mortality following  
222 COVID-19 infection. *The Lancet infectious diseases*. 2020.
- 223 6. Worldometer. COVID-19 CORONAVIRUS PANDEMIC. April 22, 2020. Accessed from:  
224 <https://www.worldometers.info/coronavirus/coronavirus-death-rate/>.
- 225 7. Ebrahim SH, Ahmed QA, Gozzer E, Schlagenhauf P, Memish ZA. COVID-19 and community mitigation  
226 strategies in a pandemic. *British Medical Journal Publishing Group*; 2020.
- 227 8. Zhou X, Snoswell CL, Harding LE, Bambling M, Edirippulige S, Bai X, et al. The Role of Telehealth in  
228 Reducing the Mental Health Burden from COVID-19. *Telemedicine and e-Health*. 2020.
- 229 9. Nargis Asad. Simple ways to be resilient in pandemic times. April 18, 2020. Accessed from:  
230 <https://tribune.com.pk/story/2200498/6-simple-ways-resilient-pandemic-times/>.
- 231 10. van Weel C, Kassai R, Qidwai W, Kumar R, Bala K, Gupta PP, et al. Primary healthcare policy  
232 implementation in South Asia. *BMJ global health*. 2016;1(2):e000057.
- 233 11. Brooks SK, Webster RK, Smith LE, Woodland L, Wessely S, Greenberg N, et al. The psychological  
234 impact of quarantine and how to reduce it: rapid review of the evidence. *The Lancet*. 2020.
- 235 12. Roy D, Tripathy S, Kar SK, Sharma N, Verma SK, Kaushal V. Study of knowledge, attitude, anxiety &  
236 perceived mental healthcare need in Indian population during COVID-19 pandemic. *Asian Journal of*  
237 *Psychiatry*. 2020:102083.
- 238 13. Schwartz J, King C-C, Yen M-Y. Protecting Health Care Workers during the COVID-19 Coronavirus  
239 Outbreak—Lessons from Taiwan's SARS response. *Clinical Infectious Diseases*. 2020.
- 240 14. Collett M. Coronavirus update: more COVID-19 cases confirmed across Australia as shoppers stock  
241 up on toilet paper, groceries. 2020. Available at [https://www.abc.net.au/news/2020-03-04/coronavirus-](https://www.abc.net.au/news/2020-03-04/coronavirus-live-updates-toiletpaper-panic-buyinglimits/12023040)  
242 [live-updates-toiletpaper-panic-buyinglimits/12023040](https://www.abc.net.au/news/2020-03-04/coronavirus-live-updates-toiletpaper-panic-buyinglimits/12023040) (last accessed March 20, 2020).
- 243 15. WHO, 2020c. Rolling Updates on Coronavirus Disease (COVID-19). Accessed from: URL  
244 <https://www.who.int/emergencies/diseases/novel-coronavirus-2019/events-as-they-happen>.
- 245 16. Liu T, Chen X, Miao G. Recommendations on diagnostic criteria and prevention of SARS-related  
246 mental disorders. *J Clin Psychol Med*. 2003;13:188-91.
- 247 17. Maunder R, Hunter J, Vincent L, Bennett J, Peladeau N, Leszcz M, et al. The immediate psychological  
248 and occupational impact of the 2003 SARS outbreak in a teaching hospital. *Cmaj*. 2003;168(10):1245-51.

249

250

Annex-1  
In-Depth Interview Guide for interviewing community members

Basic Information

| S.no | Participant Code (Confidential) | Age | Sex | Occupation | Educational level | Locality/site |
|------|---------------------------------|-----|-----|------------|-------------------|---------------|
|      |                                 |     |     |            |                   |               |
|      |                                 |     |     |            |                   |               |
|      |                                 |     |     |            |                   |               |
|      |                                 |     |     |            |                   |               |
|      |                                 |     |     |            |                   |               |
|      |                                 |     |     |            |                   |               |
|      |                                 |     |     |            |                   |               |
|      |                                 |     |     |            |                   |               |
|      |                                 |     |     |            |                   |               |
|      |                                 |     |     |            |                   |               |

**General Perceptions and knowledge about COVID-19**

1. How do you feel about your knowledge level regarding COVID-19 pandemic?
2. How did you learn about the coronavirus outbreak?
3. What is the reliable source of information about COVID-19?

Probes: social media, television, newspapers/magazines, websites, friends/family, health care professionals

4. What were your initial reactions towards COVID-19, when you first heard about it?
  - a. Probes: curse from God etc.
5. What are your thoughts and feelings about COVID-19 cases?

**Perceptions on safety measures for preventing COVID-19**

1. What safety measures have you taken for yourself and for your family safety in COVID-19?

**Probes:** hand washing, sanitizer, social distancing, covering your cough, avoiding touching your eyes, nose, and mouth with unwashed hands, wearing a face mask, avoiding close contact with someone who is sick

- 1
  - 2
  - 3
  - 4
  - 5
  - 6
  - 7
  - 8
  - 9
  - 10
  - 11
  - 12
  - 13
  - 14
  - 15
  - 16
  - 17
  - 18
  - 19
  - 20
  - 21
  - 22
  - 23
  - 24
  - 25
  - 26
  - 27
  - 28
  - 29
  - 30
  - 31
  - 32
  - 33
  - 34
  - 35
  - 36
  - 37
  - 38
  - 39
  - 40
  - 41
  - 42
  - 43
  - 44
  - 45
  - 46
  - 47
  - 48
  - 49
  - 50
  - 51
  - 52
  - 53
  - 54
  - 55
  - 56
  - 57
  - 58
  - 59
  - 60
2. Do you think novel coronavirus will inflict serious damage in your community, if adequate safety measures are not taken?
  3. Do you think you can protect yourself against the novel coronavirus?

### **Perception about fears, anxiety stress and coping about COVID-19**

1. How you perceive life during the COVID- pandemic?
  - a. Probes: affected daily routine
2. What are your fears and anxieties related to COVID-19?
3. What are the mental health consequences of the COVID-19 lockdown and social isolation you and your family?
4. How the current pandemic has caused stress in life's of people and it has also dramatically affected you and your family? (financial glitches, disputes, jobs)
5. How COVID-19 has influenced your temperament, feelings and emotions?
6. What is the effect of repeated media consumption about COVID-19 in traditional and social media on mental health?
7. How do you cope with anxiety and fear related to COVID-19 pandemic?
8. Do you feel the need of having mental health programs or other measures to overcome anxiety, fear and stress in this pandemic situation?
9. Do you have any suggestions on how government could provide support services for coping with stress related to this crisis situations? (Coping strategies)
10. Currently, what sort of help or support is accessible to you and your family to cope with the pandemic situation?
11. What are the best methods for promoting successful adherence to behavioural advice about COVID-19 while enabling mental wellbeing and minimizing distress?

### **Future Preparedness**

1. In your opinion, what are the needs for future preparedness for any outbreak that prepare community (trainings, awareness, equipment, protective gears)



# BMJ Open

## The impact of COVID-19 pandemic on mental health and well-being of communities: An exploratory qualitative study protocol

|                                 |                                                                                                                                                                                                                                                                                                                                                                                                               |
|---------------------------------|---------------------------------------------------------------------------------------------------------------------------------------------------------------------------------------------------------------------------------------------------------------------------------------------------------------------------------------------------------------------------------------------------------------|
| Journal:                        | <i>BMJ Open</i>                                                                                                                                                                                                                                                                                                                                                                                               |
| Manuscript ID                   | bmjopen-2020-041641.R1                                                                                                                                                                                                                                                                                                                                                                                        |
| Article Type:                   | Protocol                                                                                                                                                                                                                                                                                                                                                                                                      |
| Date Submitted by the Author:   | 02-Nov-2020                                                                                                                                                                                                                                                                                                                                                                                                   |
| Complete List of Authors:       | Shahil Feroz, Anam; Aga Khan University, Community Health Sciences Akberali, Naureen; Aga Khan University, School of Nursing and Midwifery Akber Ali, Noshaba; Aga Khan University Feroz, Ridah; Aga Khan University Institute for Educational Development Pakistan<br>Nazim Meghani, Salima; Aga Khan University, Community Health Sciences<br>Saleem, Sarah; Aga Khan University, Community Health Sciences |
| <b>Primary Subject Heading</b>: | Research methods                                                                                                                                                                                                                                                                                                                                                                                              |
| Secondary Subject Heading:      | Qualitative research                                                                                                                                                                                                                                                                                                                                                                                          |
| Keywords:                       | MENTAL HEALTH, Public health < INFECTIOUS DISEASES, PUBLIC HEALTH                                                                                                                                                                                                                                                                                                                                             |
|                                 |                                                                                                                                                                                                                                                                                                                                                                                                               |

SCHOLARONE™  
Manuscripts



I, the Submitting Author has the right to grant and does grant on behalf of all authors of the Work (as defined in the below author licence), an exclusive licence and/or a non-exclusive licence for contributions from authors who are: i) UK Crown employees; ii) where BMJ has agreed a CC-BY licence shall apply, and/or iii) in accordance with the terms applicable for US Federal Government officers or employees acting as part of their official duties; on a worldwide, perpetual, irrevocable, royalty-free basis to BMJ Publishing Group Ltd ("BMJ") its licensees and where the relevant Journal is co-owned by BMJ to the co-owners of the Journal, to publish the Work in this journal and any other BMJ products and to exploit all rights, as set out in our [licence](#).

The Submitting Author accepts and understands that any supply made under these terms is made by BMJ to the Submitting Author unless you are acting as an employee on behalf of your employer or a postgraduate student of an affiliated institution which is paying any applicable article publishing charge ("APC") for Open Access articles. Where the Submitting Author wishes to make the Work available on an Open Access basis (and intends to pay the relevant APC), the terms of reuse of such Open Access shall be governed by a Creative Commons licence – details of these licences and which [Creative Commons](#) licence will apply to this Work are set out in our licence referred to above.

Other than as permitted in any relevant BMJ Author's Self Archiving Policies, I confirm this Work has not been accepted for publication elsewhere, is not being considered for publication elsewhere and does not duplicate material already published. I confirm all authors consent to publication of this Work and authorise the granting of this licence.

1  
2  
3 **1 Paper Title:**  
4

5 2 The impact of COVID-19 pandemic on mental health and well-being of communities: An exploratory  
6 3 qualitative study protocol  
7  
8

9  
10 **4 Author Names:**  
11

- 12 5 1. Ms. Anam Shahil Feroz<sup>1\*</sup> (ASF)  
13  
14 6 2. Ms. Naureen Akber Ali<sup>2</sup> (NAA)  
15  
16 7 3. Ms. Noshaba Akber Ali<sup>3</sup> (NBA)  
17  
18 8 4. Ms. Ridah Feroz<sup>4</sup> (RF)  
19  
20 9 5. Ms. Salima Nazim Meghani<sup>5</sup> (SNM)  
21  
22 10 6. Dr Sarah Saleem<sup>6</sup> (SS)  
23  
24

25  
26 **11 Full institutional mailing addresses of all authors**  
27

28 1, 3,5,6 The Aga Khan University – Department of Community Health Sciences, Stadium Road, PO  
29 13 Box 3500, Karachi 74800, Pakistan

30  
31  
32 14 <sup>2</sup>The Aga Khan University – School of Nursing and Midwifery, Stadium Road, PO Box 3500,  
33 15 Karachi 74800, Pakistan  
34

35  
36  
37 16 <sup>4</sup>Aga Khan University Institute for Educational Development, Karachi, Pakistan  
38

39  
40 **17 Email addresses:**  
41

- 42 18 1. Ms. Anam Shahil Feroz<sup>\*1</sup> – AF- [anam.feroz@aku.edu](mailto:anam.feroz@aku.edu)  
43  
44 19 2. Ms. Naureen Akber Ali<sup>2</sup> – NAA - [naureen.akberali@aku.edu](mailto:naureen.akberali@aku.edu)  
45  
46 20 3. Ms. Noshaba Akber Ali<sup>3</sup> (NBA) – [noshaba.akber07@gmail.com](mailto:noshaba.akber07@gmail.com)  
47  
48 21 4. Ms. Rida Feroz<sup>4</sup> (RF) - [ridah.feroz.mphil19@student.aku.edu](mailto:ridah.feroz.mphil19@student.aku.edu)  
49  
50 22 5. Ms. Salima Nazim Meghani<sup>5</sup> (SNM) - [salima.ratnani@gmail.com](mailto:salima.ratnani@gmail.com)  
51  
52 23 6. Dr Sarah Saleem<sup>6</sup> – SS – [sarah.saleem@aku.edu](mailto:sarah.saleem@aku.edu)  
53  
54

55  
56 **24 Corresponding Author\*:**  
57  
58  
59  
60

1  
2  
3  
4  
5  
6  
7  
8  
9  
10  
11  
12  
13  
14  
15  
16  
17  
18  
19  
20  
21  
22  
23  
24  
25  
26  
27  
28  
29  
30  
31  
32  
33  
34  
35  
36  
37  
38  
39  
40  
41  
42  
43  
44  
45  
46  
47  
48  
49  
50  
51  
52  
53  
54  
55  
56  
57  
58  
59  
60

1. Ms. Anam Shahil Feroz\*<sup>1</sup> – AF- [anam.feroz@aku.edu](mailto:anam.feroz@aku.edu)

Postal Address: 1. Aga Khan University, Community Health Sciences Karachi, PK

Phone Number: 922134864917

**Key words:** COVID-19, exploratory qualitative study, mental health, community, perceptions

**Word count:** 1944 words

For peer review only

1  
2  
3 **31 Abstract**  
4  
5

6 **32 Introduction:** The COVID-19 pandemic has certainly resulted in an increased level of anxiety and  
7  
8 **33** fear among communities which are related to its management and infection spread. Due to fear and  
9  
10 **34** social stigma linked with COVID-19, many individuals in the community hide their disease and  
11  
12 **35** didn't reach health care facilities in timely manner. In addition, rumors, myths and inaccurate  
13  
14 **36** information about virus are also spreading rapidly with the widespread use of social media leading  
15  
16 **37** to intensified irritability, fearfulness, insomnia, oppositional behavior and somatic complaints.  
17  
18 **38** Considering the relevance of all the above factors, we aim to explore perceptions and attitudes of  
19  
20 **39** community members towards COVID-19 and its impact on their daily lives and mental well-being.

21 **40 Methods and analysis:** This formative research will employ an exploratory qualitative research  
22  
23 **41** design using semi-structured interviews and a purposive sampling approach. The data collection  
24  
25 **42** methods for this formative research will include in-depth interviews (IDIs) with community  
26  
27 **43** members. The study will be conducted in Karimabad FB area and Garden (East and West)  
28  
29 **44** community settings of Karachi, Pakistan. The areas have been selected purposively to interview  
30  
31 **45** members of these communities. Study data will be analyzed thematically using NVivo 12 Plus  
32  
33 **46** software.

34 **47 Ethics and Dissemination:** Ethical approval for this study has been obtained from the Aga Khan  
35  
36 **48** University Ethical Review Committee (AKU-ERC) [2020-4825-10599]. The study results will be  
37  
38 **49** disseminated to scientific community and research subjects participating in this study. The findings  
39  
40 **50** of this study will help us explore perceptions and attitudes of different community members towards  
41  
42 **51** COVID-19 pandemic, and its impact on daily lives and mental well-being of individuals in the  
43  
44 **52** community.

45  
46 **53**

47  
48 **54**  
49  
50  
51  
52  
53  
54  
55  
56  
57  
58  
59  
60

1  
2  
3 55 Strengths and limitations of this study  
4  
5

- 6 56 • The mental health impact of the pandemic is likely to last much longer than the physical  
7 health impact and therefore this study is positioned well to explore perceptions and attitudes  
8 57 of community members towards COVID-19 pandemic, and its impact on their daily lives  
9 58 and mental well-being.  
10 59  
11 60 • This study will guide the development of context-specific innovative mental health programs  
12 to support communities in future.  
13 61  
14 62 • One limitation is that all study respondents were interviewed online, to minimize the risk of  
15 infection. Due to this reason, the authors will not have the opportunity to build rapport with  
16 respondents over Zoom or obtain non-verbal cues during interviews  
17 63  
18 64  
19  
20  
21  
22  
23  
24 66  
25  
26  
27  
28  
29  
30  
31  
32  
33  
34  
35  
36  
37  
38  
39  
40  
41  
42  
43  
44  
45  
46  
47  
48  
49  
50  
51  
52  
53  
54  
55  
56  
57  
58  
59  
60

## 67 **Background**

68 COVID-19 pandemic has affected almost 180 countries, since its first detection in Wuhan, China,  
69 in December 2019 (1, 2). The COVID-19 outbreak has been declared as a Public Health Emergency  
70 of International Concern by the World Health Organization (WHO) (3). WHO estimates the global  
71 mortality of about 3.4%(4), however, the death rates will vary between countries and across age  
72 groups. (5). In Pakistan, a total of 10,880 cases and 228 deaths has been reported, to date, due to  
73 COVID-19 infection (6).

74 The worldwide COVID-19 pandemic has not only incurred massive challenges to the global supply  
75 chains and healthcare systems but also has a detrimental effect on the overall health of individuals  
76 (7). The pandemic has led to lockdowns and has created a havoc impact on the societies at large.  
77 Most company employees' including daily wage workers have been prohibited from accessing their  
78 workplaces or being asked to work from home which has caused job-related insecurities and  
79 financial crises among the communities (8). Besides, educational institutions and training centers  
80 have been closed due to which children have lost their routine of going to schools, studying, and  
81 socializing with their peers. Also, the delay in examinations is likewise a huge stressor for students  
82 (8). Alongside this, parents have been struggling on creating a structured milieu for their children(9).  
83 COVID-19 has hindered the normal routine life of every individual be it children, teenagers, adults,  
84 or the elderly. The crisis is engendering burden throughout the population and communities  
85 particularly in developing countries like Pakistan that face major challenges due to the fragile health  
86 care systems and poor economic structures (10)

87 The pandemic of COVID-19 has certainly resulted in an increased level of anxiety and fear among  
88 communities related to its management and infection spread(8). Further, the highly contagious  
89 nature of the COVID-19 has also escalated confusion, fear, and panic among community residents.  
90 Moreover, social distancing is often an unpleasant experience for the community members and for  
91 the patients who undergo it as it adds to mental suffering, particularly in the local setting where get-  
92 togethers with friends and families are a major source of entertainment(9). Recent studies also  
93 showed that individuals who are following social distancing experience loneliness causing a  
94 substantial level of distress in the form of anxiety, stress, anger, misperception, and post-traumatic  
95 stress symptoms (8, 11). Separation from the family members, the loss of autonomy, insecurity over

1  
2  
3 96 disease status, inadequate supplies, inadequate information, financial loss, frustration, stigma, and  
4  
5 97 boredom, are all major stressors that can create drastic impacts on an individual's life. (11). Due to  
6  
7 98 fear and social stigma linked with COVID-19, many individuals in the community hide their disease  
8  
9 99 and didn't reach health care facilities timely (12). Besides rumors, myths and inaccurate information  
10  
11 100 about COVID-19 are also spreading rapidly with the widespread use of social media (13) that is not  
12  
13 101 only confined to adults but is also carried onto the children leading to intensified irritability,  
14  
15 102 fearfulness, insomnia, oppositional behavior and somatic complaints(9). The psychological  
16  
17 103 symptoms associated with COVID-19 at the community level is also manifested as anxiety-driven  
18  
19 104 panic buying, resulting in exhaustion of resources from the market (14). Some level of panic also  
20  
21 105 dwells in the community because of the unavailability of essential protective equipment particularly  
22  
23 106 masks and sanitizers (15). Similarly, mental health issues including depression, anxiety, panic  
24  
25 107 attacks, psychotic symptoms, and even suicide were also reported during the early SARS outbreak  
26  
27 108 (16, 17). Likely, COVID-19 is also posing a similar risk throughout the world (12).

27 109 The fear of transmitting disease or a family member falling ill is a probable mental function of human  
28  
29 110 nature, but at some point, psychological fear of the disease generates more anxiety than the disease  
30  
31 111 itself. Therefore, mental health problems are likely to increase in an epidemic situation among  
32  
33 112 community residents. Considering the relevance of all the above factors, we aim to explore  
34  
35 113 perception and attitudes of the COVID-19 among the community residents' the , and the impact of  
36  
37 114 those perceptions & attitude on daily lives and mental well-being of community residents.

## 38 39 115 **Methods and analysis**

### 40 41 116 ***Study design***

42  
43 117 This study will employ an exploratory qualitative research design using semi-structured interviews  
44  
45 118 and a purposive sampling approach. The data collection methods for this formative research will  
46  
47 119 include in-depth *interviews* (IDIs) with community members. The IDIs aim to explore perceptions  
48  
49 120 of community members towards COVID-19 and its impact on their mental well-being.

### 50 51 121 ***Study setting and study participants***

52  
53 122 The study will be conducted in two communities of Karachi city. These include Karimabad Federal  
54  
55 123 B Area Block 3 Gulberg Town, Garden East, and Garden West area of Karachi city. Karimabad is a



124 neighborhood in the Karachi Central district of Karachi, Pakistan. It is situated in the south of  
 125 Gulberg Town bordering Liaquatabad, Gharibabad, and Federal B. Area. The population of this  
 126 neighborhood is predominantly Ismailis. People living here belong mostly to the middle class to the  
 127 lower middle class. It is also known for its wholesale market of sports goods and stationery.  
 128 Garden is an upmarket neighborhood, which is in the Karachi South district of Karachi, Pakistan. It  
 129 is subdivided into two neighborhoods: Garden East and Garden West. It is the residential area  
 130 around the Karachi Zoological Gardens, hence it is popularly known as the 'Garden' area. The  
 131 population of Garden used to be primarily Ismaili and Goan Catholic but has seen increasing  
 132 numbers of Memons, Pashtuns, and Baloch. These areas have been selected purposively because the  
 133 few members of these communities are already known by one of the co-investigators. The co-  
 134 investigator will serve as a gatekeeper for providing entrance to the community for the purpose of  
 135 this study. Adult community members of different ages and both genders will be interviewed from  
 136 both sites, as mentioned in the below table 1. Interview participants will be selected based on the  
 137 eligibility criteria.

138 Table 1 Study participants for IDIs

| In-depth interview Participants  | Sample Range            |
|----------------------------------|-------------------------|
| Young adults (18 -35 years)      | 6-8 (4 male & 4 female) |
| Middle-aged adults (36-55 years) | 6-8 (4 male & 4 female) |
| Older adults (> 55 years)        | 6-8 (4 male & 4 female) |

#### 140 *In-depth interviews with community members*

141 We will conduct in-depth interviews (IDIs) with community members to explore the perceptions  
 142 and attitudes of community members towards COVID-19 and its effects on their daily lives and  
 143 mental well-being. The in-depth interview participants will be identified via the community  
 144 WhatsApp group. The in-depth interview participant will be invited for an interview via a WhatsApp  
 145 message or email. The consent will be taken over email or WhatsApp before the interview begins,  
 146 in which they will agree that the interview can be audio-recorded and written notes can be taken.  
 147 The interviews will be conducted in either Urdu or English language and each interview will last  
 148 around 40 to 50 minutes in duration. Study participants will be assured that their information will  
 149 remain confidential and no identifying features will be mentioned on the transcript. The major  
 150 themes will include a general discussion about participant's knowledge and perceptions about the

1  
2  
3 151 COVID-19 pandemic, perceptions on safety measures, and perceived challenges in the current  
4 152 situation and its impact on their mental well-being. We anticipate that 24-30 interviews will be  
5 153 conducted but we will cease interviews once data saturation will be achieved. Data saturation is the  
6 154 point when no new themes emerged from the additional interviews. Data collection will occur  
7 155 concurrently with data analysis to determine the data saturation point. The audio recordings will be  
8 156 transcribed by a transcriptionist within 24 hrs. of the interviews.

13  
14 157 An interview guide for IDIs are given in Annex 1.

### 15 158 ***Eligibility criteria***

16 159 The inclusion and exclusion criteria for study participants are provided below:

#### 17 160 **Inclusion criteria**

- 18 161 • Residents of garden (East and west) and karimabad FB area community of Karachi, who  
19 162 have not contracted the disease.

#### 20 163 **Exclusion criteria**

- 21 164 • Those who refuse to participate in this study
- 22 165 • Participants who have experienced COVID-19 and are undergoing treatment
- 23 166 • Participants who are suspected for COVID-19 and have been isolated/quarantined
- 24 167 • Family members of COVID-19 positive cases

#### 25 168 26 169 ***Data Collection Procedure***

27 170 A semi-structured interview guide has been developed for community members. The initial  
28 171 questions in the guide will help to explore participants' perceptions and attitudes towards COVID-  
29 172 19. The additional questions in the guide will assess the impact of those perceptions & attitude on  
30 173 daily lives and mental health and well-being of community residents. . All semi-structured  
31 174 interviews will be conducted online via zoom technology or WhatsApp. Interviews will be scheduled  
32 175 on a participant's convenient day and time. Interviews are anticipated to begin on Dec 1, 2020.

#### 33 176 ***Patient and Public Involvement:***

34 177 No patient involved

1  
2  
3 178 ***Data analysis***  
4

5  
6 179 We will transcribe and translate collected data into the English Language by listening to the audio  
7  
8 180 recordings to perform a thematic analysis. NVivo 12 Plus software will be used to import, organize,  
9  
10 181 and explore data for analysis purposes. Two independent researchers will read the transcripts various  
11  
12 182 times to develop familiarity and clarification with the data. We will use an iterative process that will  
13  
14 183 help us to label the data and generate new categories to identify the emergent themes. The recorded  
15  
16 184 text will be divided into shortened units and labeled as a ‘code’ without losing the main essence of  
17  
18 185 the research study. Subsequently, codes will be then analyzed and merged into comparable  
19  
20 186 categories. Lastly, the same categories will be grouped under sub-themes and final themes. To ensure  
21  
22 187 inter-rater reliability, two independent investigators will perform the coding, category creation, and  
23  
24 188 thematic analyses. The discrepancies between the two investigators will be resolved through  
25  
26 189 consensus meetings to reduce researcher’s bias.

25 190 ***Ethics and Dissemination***  
26

27  
28 191 Study participants will be asked to provide informed, written consent prior to participation in this  
29  
30 192 study. The informed consent form can be submitted by the participant via WhatsApp or email.  
31  
32 193 Participants who are unable to write their names will be asked to provide a thumbprint to symbolize  
33  
34 194 their consent to participate. Ethical approval for this study has been obtained from the Aga Khan  
35  
36 195 University Ethical Review Committee (AKU-ERC) [2020-4825-10599]. The study results will be  
37  
38 196 disseminated to the scientific community and research subjects participating in this study. The  
39  
40 197 findings of this study will help us explore the perceptions and attitudes of different community  
41  
42 198 members towards the COVID-19 pandemic, and its impact on the daily lives and mental well-being  
43  
44 199 of individuals in the community.

44 200

46 201 **Discussion**  
47

48  
49 202 The findings of this study will help us to explore perceptions and attitudes towards the COVID-19  
50  
51 203 pandemic, and its impact on the daily lives and mental well-being of individuals in the community.  
52  
53 204 Besides, an in-depth understanding of the needs of the community will be identified, which will help  
54  
55 205 us develop context-specific innovative mental health programs to support communities in the future.  
56  
57  
58  
59

1  
2  
3  
4  
5  
6  
7  
8  
9  
10  
11  
12  
13  
14  
15  
16  
17  
18  
19  
20  
21  
22  
23  
24  
25  
26  
27  
28  
29  
30  
31  
32  
33  
34  
35  
36  
37  
38  
39  
40  
41  
42  
43  
44  
45  
46  
47  
48  
49  
50  
51  
52  
53  
54  
55  
56  
57  
58  
59  
60

206 The study will provide insights into how communities are managing their lives under such a difficult  
207 situation.

208

For peer review only

1  
2  
3 209 a. Contributorship statement

4 210 AF and NAA conceived the study; AF, NAA, RF, NBA, SNM, SS contributed to the development of the study  
5 211 design and final protocols for sample selection, and interviews. AF and NAA contributed to writing the  
6 212 manuscript. All authors reviewed and approved the final version of the paper.  
7 213

8  
9 214 b. Competing interests

10 215 The authors declare that they have no competing interests.  
11 216

12 217 c. Funding

13 218 Self-funded  
14 219

15 220 d. Data sharing statement

16 221 Materials described in this paper pertain to the study protocol only and there are no raw data reported.

17 222 The datasets will be collected and analyzed and can be made available from the corresponding author on  
18 223 reasonable request.  
19  
20

21 224  
22  
23  
24  
25  
26  
27  
28  
29  
30  
31  
32  
33  
34  
35  
36  
37  
38  
39  
40  
41  
42  
43  
44  
45  
46  
47  
48  
49  
50  
51  
52  
53  
54  
55  
56  
57  
58  
59  
60

225 **References:**

- 226 1. Heymann DL. Data sharing and outbreaks: best practice exemplified. *The Lancet*.  
227 2020;395(10223):469-70.
- 228 2. Vara. V. Coronavirus outbreak: The countries affected. 16 April 2020. Accessed from:  
229 <https://www.pharmaceutical-technology.com/features/coronavirus-outbreak-the-countries-affected/>.
- 230 3. World Health Organization. Mental health and psychosocial considerations during the COVID-19  
231 outbreak, 18 March 2020. World Health Organization; 2020.
- 232 4. WHO, 2020b. Coronavirus Disease 2019 (COVID-19) Situation Report – 46. Accessed from:  
233 [https://www.who.int/docs/default-source/coronaviruse/situation-reports/20200306-sitrep-46-COVID-](https://www.who.int/docs/default-source/coronaviruse/situation-reports/20200306-sitrep-46-COVID-19.pdf?sfvrsn=96b04adf_2)  
234 [19.pdf?sfvrsn=96b04adf\\_2](https://www.who.int/docs/default-source/coronaviruse/situation-reports/20200306-sitrep-46-COVID-19.pdf?sfvrsn=96b04adf_2)
- 235 5. Baud D, Qi X, Nielsen-Saines K, Musso D, Pomar L, Favre G. Real estimates of mortality following  
236 COVID-19 infection. *The Lancet infectious diseases*. 2020.
- 237 6. Worldometer. COVID-19 CORONAVIRUS PANDEMIC. April 22, 2020. Accessed from:  
238 <https://www.worldometers.info/coronavirus/coronavirus-death-rate/>.
- 239 7. Ebrahim SH, Ahmed QA, Gozzer E, Schlagenhauf P, Memish ZA. COVID-19 and community mitigation  
240 strategies in a pandemic. *British Medical Journal Publishing Group*; 2020.
- 241 8. Zhou X, Snoswell CL, Harding LE, Bambling M, Edirippulige S, Bai X, et al. The Role of Telehealth in  
242 Reducing the Mental Health Burden from COVID-19. *Telemedicine and e-Health*. 2020.
- 243 9. Nargis Asad. Simple ways to be resilient in pandemic times. April 18, 2020. Accessed from:  
244 <https://tribune.com.pk/story/2200498/6-simple-ways-resilient-pandemic-times/>.
- 245 10. van Weel C, Kassai R, Qidwai W, Kumar R, Bala K, Gupta PP, et al. Primary healthcare policy  
246 implementation in South Asia. *BMJ global health*. 2016;1(2):e000057.
- 247 11. Brooks SK, Webster RK, Smith LE, Woodland L, Wessely S, Greenberg N, et al. The psychological  
248 impact of quarantine and how to reduce it: rapid review of the evidence. *The Lancet*. 2020.
- 249 12. Roy D, Tripathy S, Kar SK, Sharma N, Verma SK, Kaushal V. Study of knowledge, attitude, anxiety &  
250 perceived mental healthcare need in Indian population during COVID-19 pandemic. *Asian Journal of*  
251 *Psychiatry*. 2020:102083.
- 252 13. Schwartz J, King C-C, Yen M-Y. Protecting Health Care Workers during the COVID-19 Coronavirus  
253 Outbreak—Lessons from Taiwan's SARS response. *Clinical Infectious Diseases*. 2020.
- 254 14. Collett M. Coronavirus update: more COVID-19 cases confirmed across Australia as shoppers stock  
255 up on toilet paper, groceries. 2020. Available at [https://www.abc.net.au/news/2020-03-04/coronavirus-](https://www.abc.net.au/news/2020-03-04/coronavirus-live-updates-toiletpaper-panic-buyinglimits/12023040)  
256 [live-updates-toiletpaper-panic-buyinglimits/12023040](https://www.abc.net.au/news/2020-03-04/coronavirus-live-updates-toiletpaper-panic-buyinglimits/12023040) (last accessed March 20, 2020).
- 257 15. WHO, 2020c. Rolling Updates on Coronavirus Disease (COVID-19). Accessed from: URL  
258 <https://www.who.int/emergencies/diseases/novel-coronavirus-2019/events-as-they-happen>.
- 259 16. Liu T, Chen X, Miao G. Recommendations on diagnostic criteria and prevention of SARS-related  
260 mental disorders. *J Clin Psychol Med*. 2003;13:188-91.
- 261 17. Maunder R, Hunter J, Vincent L, Bennett J, Peladeau N, Leszcz M, et al. The immediate psychological  
262 and occupational impact of the 2003 SARS outbreak in a teaching hospital. *Cmaj*. 2003;168(10):1245-51.

263

264

Annex-1  
In-Depth Interview Guide for interviewing community members

Basic Information

| S.no | Participant Code (Confidential) | Age | Sex | Occupation | Educational level | Locality/site |
|------|---------------------------------|-----|-----|------------|-------------------|---------------|
|      |                                 |     |     |            |                   |               |
|      |                                 |     |     |            |                   |               |
|      |                                 |     |     |            |                   |               |
|      |                                 |     |     |            |                   |               |
|      |                                 |     |     |            |                   |               |
|      |                                 |     |     |            |                   |               |
|      |                                 |     |     |            |                   |               |

**General Perceptions and attitudes towards COVID-19**

1. How do you feel about your knowledge level regarding COVID-19 pandemic?
2. How did you learn about the coronavirus outbreak?
3. What is the reliable source of information about COVID-19?

Probes: social media, television, newspapers/magazines, websites, friends/family, health care professionals

4. What were your initial reactions towards COVID-19, when you first heard about it?
  - a. Probes: curse from God etc.
5. What are your thoughts and feelings about COVID-19 cases?

**Perceptions on safety measures for preventing COVID-19**

1. What safety measures have you taken for yourself and for your family safety in COVID-19?

**Probes:** hand washing, sanitizer, social distancing, covering your cough, avoiding touching your eyes, nose, and mouth with unwashed hands, wearing a face mask, avoiding close contact with someone who is sick

- 1
  - 2
  - 3
  - 4
  - 5
  - 6
  - 7
  - 8
  - 9
  - 10
  - 11
  - 12
  - 13
  - 14
  - 15
  - 16
  - 17
  - 18
  - 19
  - 20
  - 21
  - 22
  - 23
  - 24
  - 25
  - 26
  - 27
  - 28
  - 29
  - 30
  - 31
  - 32
  - 33
  - 34
  - 35
  - 36
  - 37
  - 38
  - 39
  - 40
  - 41
  - 42
  - 43
  - 44
  - 45
  - 46
  - 47
  - 48
  - 49
  - 50
  - 51
  - 52
  - 53
  - 54
  - 55
  - 56
  - 57
  - 58
  - 59
  - 60
2. Do you think novel coronavirus will inflict serious damage in your community, if adequate safety measures are not taken?
  3. Do you think you can protect yourself against the novel coronavirus?

### **Perception about fears, anxiety stress and coping about COVID-19**

1. How you perceive life during the COVID- pandemic?
  - a. Probes: affected daily routine
2. What are your fears and anxieties related to COVID-19?
3. What are the mental health consequences of the COVID-19 lockdown and social isolation you and your family?
4. How the current pandemic has caused stress in life's of people and it has also dramatically affected you and your family? (financial glitches, disputes, jobs)
5. How COVID-19 has influenced your temperament, feelings and emotions?
6. What is the effect of repeated media consumption about COVID-19 in traditional and social media on mental health?
7. How do you cope with anxiety and fear related to COVID-19 pandemic?
8. Do you feel the need of having mental health programs or other measures to overcome anxiety, fear and stress in this pandemic situation?
9. Do you have any suggestions on how government could provide support services for coping with stress related to this crisis situations? (Coping strategies)
10. Currently, what sort of help or support is accessible to you and your family to cope with the pandemic situation?
11. What are the best methods for promoting successful adherence to behavioural advice about COVID-19 while enabling mental wellbeing and minimizing distress?

### **Future Preparedness**

1. In your opinion, what are the needs for future preparedness for any outbreak that prepare community (trainings, awareness, equipment, protective gears)
