# Supplementary material for: Impact of the COVID-19 pandemic on mental health and well-being of communities: an exploratory qualitative study protocol
Source: PubMed Central journal article supplement — BMJ Open. 2020 Dec 31;10(12):e041641. doi: 10.1136/bmjopen-2020-041641 (PMC7780420; doi:10.1136/bmjopen-2020-041641), 2020-12-31
Supplement: bmjopen-2020-041641supp001.pdf [file bmjopen-2020-041641supp001.pdf]

Annex-1  
In-Depth Interview Guide for interviewing community members

Basic Information

| S.no | Participant Code (Confidential) | Age | Sex | Occupation | Educational level | Locality/site |
|------|---------------------------------|-----|-----|------------|-------------------|---------------|
|      |                                 |     |     |            |                   |               |
|      |                                 |     |     |            |                   |               |
|      |                                 |     |     |            |                   |               |
|      |                                 |     |     |            |                   |               |
|      |                                 |     |     |            |                   |               |

**General Perceptions and attitudes towards COVID-19**

1. How do you feel about your knowledge level regarding COVID-19 pandemic?
2. How did you learn about the coronavirus outbreak?
3. What is the reliable source of information about COVID-19?

Probes: social media, television, newspapers/magazines, websites, friends/family, health care professionals

4. What were your initial reactions towards COVID-19, when you first heard about it?
  - a. Probes: curse from God etc.
5. What are your thoughts and feelings about COVID-19 cases?

**Perceptions on safety measures for preventing COVID-19**

1. What safety measures have you taken for yourself and for your family safety in COVID-19?

**Probes:** hand washing, sanitizer, social distancing, covering your cough, avoiding touching your eyes, nose, and mouth with unwashed hands, wearing a face mask, avoiding close contact with someone who is sick

2. Do you think novel coronavirus will inflict serious damage in your community, if adequate safety measures are not taken?
3. Do you think you can protect yourself against the novel coronavirus?

### **Perception about fears, anxiety stress and coping about COVID-19**

1. How you perceive life during the COVID- pandemic?
  - a. Probes: affected daily routine
2. What are your fears and anxieties related to COVID-19?
3. What are the mental health consequences of the COVID-19 lockdown and social isolation you and your family?
4. How the current pandemic has caused stress in life's of people and it has also dramatically affected you and your family? (financial glitches, disputes, jobs)
5. How COVID-19 has influenced your temperament, feelings and emotions?
6. What is the effect of repeated media consumption about COVID-19 in traditional and social media on mental health?
7. How do you cope with anxiety and fear related to COVID-19 pandemic?
8. Do you feel the need of having mental health programs or other measures to overcome anxiety, fear and stress in this pandemic situation?
9. Do you have any suggestions on how government could provide support services for coping with stress related to this crisis situations? (Coping strategies)
10. Currently, what sort of help or support is accessible to you and your family to cope with the pandemic situation?
11. What are the best methods for promoting successful adherence to behavioural advice about COVID-19 while enabling mental wellbeing and minimizing distress?

### **Future Preparedness**

1. In your opinion, what are the needs for future preparedness for any outbreak that prepare community (trainings, awareness, equipment, protective gears)
